# Supplementary material
Source: HighWire-hosted journal article supplement (https://bmjopen.bmj.com/content/12/3/e051285)
Supplement: inline-supplementary-material-2 [file inline-supplementary-material-2.pdf]

## SUPPLEMENTARY ONLINE MATERIAL 2

**Table 1:** Target daily amounts of macronutrients and functional ingredients in meals provided to the personalised plan and control groups

| Meal: Breakfast + dinner             | Control     | Personalised plan cluster |             |             |              |                  |
|--------------------------------------|-------------|---------------------------|-------------|-------------|--------------|------------------|
|                                      |             | Carbohydrate              | Microbiota  | Lipid       | Inflammation | Oxidative stress |
| Energy, kcal                         | 1200 - 1500 | 1200 - 1500               | 1200 - 1500 | 1200 - 1500 | 1200 - 1500  | 1200 - 1500      |
| Protein, %                           | 10 - 14     | 10 - 14                   | 10 - 14     | 10 - 14     | 10 - 14      | 10 - 14          |
| Carbohydrate, %                      | 45 - 55     | 45 - 55                   | 45 - 55     | 45 - 55     | 45 - 55      | 45 - 55          |
| Dietary fibre, g                     | 22 - 28     | 42 - 52*                  | 47 - 52*    | 22 - 28     | 22 - 28      | 22 - 28          |
| Added sugars, g                      | 0           | 0                         | 0           | 0           | 0            | 0                |
| Fat, %                               | 30 - 40     | 30 - 40                   | 30 - 40     | 30 - 40     | 30 - 40      | 30 - 40          |
| <b>Functional ingredient</b>         |             |                           |             |             |              |                  |
| Fructooligosaccharides and/or Inulin |             | 20 g                      | 20 g        |             |              |                  |
| Sunflower oil                        |             |                           |             | 20 g        |              |                  |
| Turmeric powder                      |             |                           |             |             | 6-8 g        |                  |
| Oleic acid enriched sunflower oil    |             |                           |             |             |              | 20 g             |

Values are presented in ranges (minimum-maximum) for both genders.

\*Including the functional ingredient

**Table 2:** Example of 3-day menus provided to the personalised plan and control groups during the 10-week intervention

| Day | Breakfast meal                                                                     | Ingredient                | Substituted or added ingredient in each cluster of the personalised plan group |                       |                       |                            |                            | Inflammation                            | Oxidative stress |
|-----|------------------------------------------------------------------------------------|---------------------------|--------------------------------------------------------------------------------|-----------------------|-----------------------|----------------------------|----------------------------|-----------------------------------------|------------------|
|     |                                                                                    |                           | Control<br>(female/male)                                                       | Carbohydrate          | Microbiota            | Lipid                      |                            |                                         |                  |
| 1   | • You Go Ghurt with granola                                                        | Yogurt, You Go Ghurt      | 160/210 g                                                                      |                       |                       |                            |                            |                                         |                  |
|     |                                                                                    | Roasted walnuts           | 8/10 g                                                                         |                       |                       | Not roasted                | Not roasted                | Not roasted                             |                  |
|     | • Kale salad with orange and roasted walnuts                                       | Granola                   | 20/25 g                                                                        | + 5 g FOS             | + 5 g FOS             |                            |                            |                                         |                  |
|     |                                                                                    | Orange                    | 1 piece/medium                                                                 |                       |                       |                            |                            |                                         |                  |
|     | • Cucumber and celery with pumpkin seeds juice                                     | Kale                      | 40 g                                                                           |                       |                       |                            | 100 g coleslaw             | 150 g red bell pepper                   |                  |
|     | Cucumber and celery with pumpkin seeds juice                                       | 250 mL                    |                                                                                |                       |                       | +3 g turmeric              |                            |                                         |                  |
| 2   | • Quinoa porridge with baked strawberry compote                                    | Quinoa porridge           | 40/60 g                                                                        | 35/55 g + 10 g inulin | 35/55 g + 10 g inulin | 35/55 g + 5 g seed mixture | 35/55 g + 5 g seed mixture |                                         |                  |
|     |                                                                                    | Oat milk with hibiscus    | 130/180 mL                                                                     |                       |                       | + 5 g sunflower oil        |                            | + 5 g Oleic acid enriched sunflower oil |                  |
|     | • Blood orange with pine nuts and chervil                                          | Strawberry compote        | 40 g                                                                           | 30 g + 10 g FOS       | 30 g + 10 g FOS       | +5 g sunflower oil         |                            | +5 g oleic oil                          |                  |
|     |                                                                                    | Roasted pine nuts         | 5 g                                                                            |                       |                       | Not roasted                | Not roasted                | Not roasted                             |                  |
|     | • Yogurt smoothie with Mint                                                        | Chervil                   | 5 g                                                                            |                       |                       |                            |                            |                                         |                  |
|     |                                                                                    | Blood orange              | 1 piece/medium                                                                 |                       |                       |                            |                            |                                         |                  |
|     |                                                                                    | Yogurt smoothie with Mint | 250 mL                                                                         |                       |                       |                            |                            |                                         |                  |
| 3   | • Pearl barley salad with peanuts vinaigrette topped with roasted peanuts + 1 pear | Roasted peanuts           | 6 g                                                                            |                       |                       | Not roasted                | 8 g dark chocolate 70%     | 8 g dark chocolate 70%                  |                  |
|     |                                                                                    | Mint                      | 5 g                                                                            |                       |                       |                            |                            |                                         |                  |
|     |                                                                                    | Lime                      | 20 g                                                                           |                       |                       |                            |                            |                                         |                  |
|     | • Yogurt with baked blueberries                                                    | Yogurt/You Go Ghurt       | 70 g                                                                           |                       |                       |                            |                            |                                         |                  |
|     |                                                                                    | Baked blueberries         | 10 g                                                                           |                       |                       |                            |                            |                                         |                  |
|     | • Raspberry/chili/and violet cabbage juice                                         | Peanut vinaigrette        | 18/25 g                                                                        |                       |                       | 9/13 g sunflower oil       | + 3 g turmeric             | 9/13 g oleic oil                        |                  |
|     |                                                                                    | Boiled pearl barley       | 80/110 g                                                                       |                       |                       |                            |                            |                                         |                  |
|     |                                                                                    | Pear                      | 1 piece/medium                                                                 | 100 g kale            | 100 g kale            | 100 g kale                 |                            |                                         |                  |
|     | Raspberry/chili and violet cabbage juice                                           | 250 mL                    |                                                                                |                       |                       |                            |                            |                                         |                  |

Continued.

Concluded.

| Day | Dinner meal                                                                | Ingredients                   | Personalised plan substituted ingredient in each cluster* |                                                   |                                                   |                                                                       |                                          |                                                                   |                 |
|-----|----------------------------------------------------------------------------|-------------------------------|-----------------------------------------------------------|---------------------------------------------------|---------------------------------------------------|-----------------------------------------------------------------------|------------------------------------------|-------------------------------------------------------------------|-----------------|
|     |                                                                            |                               | Control<br>(female/male)                                  | Carbohydrate                                      | Microbiota                                        | Lipid                                                                 | Inflammation                             | Oxidative stress                                                  |                 |
| 1   | Vegetarian massaman curry with cilantro/quinoa and baked tomatoes          | Massaman curry                | 230/325 g                                                 | 220/315 g with 118 g sweet potato + 10 g inulin   | 220/315 g + 10 g inulin                           |                                                                       | With 122 g sweet potatoes + 5 g turmeric | Extra baked carrots - 70 g                                        |                 |
|     |                                                                            | Rapeseed oil                  | 1 teaspoon                                                |                                                   |                                                   |                                                                       |                                          |                                                                   |                 |
|     |                                                                            | Sesame oil dressing           | 20 g                                                      |                                                   |                                                   | 6.7 g sunflower oil                                                   |                                          | 6.7 Oleic oil                                                     |                 |
|     |                                                                            | Sesame seeds                  | 4 g                                                       |                                                   |                                                   |                                                                       |                                          |                                                                   |                 |
|     |                                                                            | Baby spinach                  | 5 g                                                       |                                                   |                                                   |                                                                       |                                          |                                                                   |                 |
|     |                                                                            | Cilantro                      | 5 g                                                       |                                                   |                                                   |                                                                       |                                          |                                                                   |                 |
|     |                                                                            | Cooked quinoa                 | 110/150 g                                                 |                                                   |                                                   |                                                                       | 105/145 g + 5 g seed mixture             | +5 g seed mixture                                                 |                 |
|     |                                                                            | Tomato                        | 90 g                                                      |                                                   |                                                   |                                                                       |                                          |                                                                   |                 |
| 2   | Baked eggplant with green hummus/bulgur salad and Turkish flatbread        | Bell pepper/red               | 1 piece/medium                                            | +30 g kale                                        | +30 g kale                                        | +20 g kale                                                            |                                          |                                                                   |                 |
|     |                                                                            | Baked eggplant                | 65/75 g                                                   |                                                   |                                                   |                                                                       |                                          |                                                                   |                 |
|     |                                                                            | Sunflower oil                 | 1 teaspoon                                                |                                                   |                                                   |                                                                       |                                          |                                                                   |                 |
|     |                                                                            | Flatbread with nigella sativa | 120/150 g                                                 |                                                   |                                                   |                                                                       | +3 g hemp seeds                          | +4 g turmeric                                                     | +3 g hemp seeds |
|     |                                                                            | Green hummus                  | 60/80 g                                                   | 55/75 g + 5 g inulin                              | 55/75 g + 5 g inulin                              | 6/8 g sunflower oil                                                   |                                          | 6/8 g oleic oil                                                   |                 |
|     |                                                                            | Mint cream                    | 40 g                                                      |                                                   |                                                   |                                                                       |                                          |                                                                   |                 |
|     |                                                                            | Lemon dressing                | 20 g                                                      | 20 g lemon dressing with 5 g FOS (replaces sirup) | 20 g lemon dressing with 5 g FOS (replaces sirup) | 10 g sunflower oil (replaces the canola/olive oil in standard recipe) |                                          | 10 g oleic oil (replaces the canola/olive oil in standard recipe) |                 |
|     |                                                                            | Parsley                       | 5 g                                                       |                                                   |                                                   |                                                                       |                                          |                                                                   |                 |
|     |                                                                            | Bulgur                        | 30/45 g                                                   |                                                   |                                                   |                                                                       |                                          |                                                                   |                 |
|     |                                                                            | Tomato                        | 100 g                                                     |                                                   |                                                   |                                                                       |                                          |                                                                   |                 |
|     |                                                                            | Courgette                     | 150 g                                                     | 150 g red cabbage                                 | 150 g red cabbage                                 | 150 g red cabbage                                                     |                                          | 120 g carrot                                                      |                 |
| 3   | Trofie pasta with cauliflower sauce and fried pak-choi + green bell pepper | Cauliflower sauce             | 140/190 g                                                 | 135/185 g + 10 g FOS                              | 135/185 g + 10 g FOS                              |                                                                       |                                          |                                                                   |                 |
|     |                                                                            | Extra virgin olive oil        | 2.5 g                                                     |                                                   |                                                   |                                                                       |                                          |                                                                   |                 |
|     |                                                                            | Mint                          | 5 g                                                       |                                                   |                                                   |                                                                       |                                          |                                                                   |                 |
|     |                                                                            | Marinated split peas          | 60/80 g                                                   |                                                   |                                                   |                                                                       |                                          | 4 g turmeric + 4 g hemp seed                                      |                 |
|     |                                                                            | Lime dressing                 | 30 g                                                      |                                                   |                                                   |                                                                       |                                          |                                                                   |                 |
|     |                                                                            | Pak-choi                      | 90 g                                                      | 100 g broccoli                                    | 100 g broccoli                                    | 100 g broccoli                                                        |                                          | 100 g Chinese cabbage                                             |                 |
|     |                                                                            | Bell pepper/green             | ½ piece (100 g)                                           | 75 g kale                                         | 75 g kale                                         | 75 g kale                                                             |                                          | 150 g red bell pepper                                             |                 |
|     |                                                                            | Pasta/Trofie                  | 120/150 g                                                 | Whole grain linguine                              | Whole grain linguine                              | Whole grain linguine                                                  | Whole grain linguine                     | Whole grain linguine                                              |                 |

\*Added or substituted ingredients from the control diet.

Values are presented as 'female/male' unless equal for both genders.

Abbreviations: FOS, fructooligosaccharides.

**Table 3:** Nutritional information of the 3-days menus

| <b>Day 1, Breakfast</b> | <b>Control</b>  | <b>Carbohydrate</b> | <b>Microbiota</b> | <b>Lipid</b>    | <b>Inflammation</b> | <b>Oxidative stress</b> |
|-------------------------|-----------------|---------------------|-------------------|-----------------|---------------------|-------------------------|
| Energy, kcal            | 507/601         | 505/596             | 515/609           | 507/601         | 510/604             | 529/623                 |
| Protein, g (%)          | 14 (11)/16 (10) | 13 (10)/16 (10)     | 14 (10)/16 (10)   | 14 (11)/16 (10) | 13 (10)/15 (10)     | 14 (10)/16 (10)         |
| Carbohydrate, g (%)     | 55 (43)/62 (41) | 54 (42)/61 (40)     | 56 (43)/63 (41)   | 55 (43)/62 (41) | 56 (44)/63 (42)     | 60 (45)/67 (43)         |
| Dietary fibre, g        | 13/14           | 17/18               | 17/18             | 13/14           | 13/14               | 13/14                   |
| Sugars, g               | 29/31           | 28/29               | 29/31             | 29/31           | 29/30               | 35/35                   |
| Added sugars, g         | 0               | 0                   | 0                 | 0               | 0                   | 0                       |
| Fat, g (%)              | 24 (41)/30 (44) | 24 (41)/30 (44)     | 24 (41)/30 (43)   | 24 (41)/30 (44) | 24 (41)/31 (44)     | 24 (41)/31 (44)         |
| Saturated fat, g        | 4/5             | 4/5                 | 4/5               | 4/5             | 4/5                 | 4/5                     |
| Monounsaturated fat, g  | 3               | 3/4                 | 3                 | 3               | 3                   | 3                       |
| Polyunsaturated fat, g  | 6/7             | 6/7                 | 6/7               | 6/7             | 6/7                 | 6/7                     |
| Salt, g                 | 0.5             | 0.5                 | 0.5               | 0.5             | 0.5                 | 0.5                     |
| <b>Day 2, Breakfast</b> |                 |                     |                   |                 |                     |                         |
| Energy, kcal            | 501/608         | 512/618             | 512/615           | 505/612         | 507/614             | 499/606                 |
| Protein, g (%)          | 12 (10)/15 (10) | 12 (9)/15 (9)       | 12 (9)/15 (10)    | 12 (10)/15 (10) | 13 (10)/16 (10)     | 12 (10)/15 (10)         |
| Carbohydrate, g (%)     | 65 (53)/82 (55) | 63 (50)/80 (52)     | 63 (50)/80 (52)   | 55 (44)/72 (48) | 63 (50)/80 (53)     | 57 (46)/75 (49)         |
| Dietary fibre, g        | 10/12           | 27/29               | 27/29             | 11/13           | 11/13               | 10/12                   |
| Sugars, g               | 22/24           | 24/33               | 22/24             | 20/23           | 22/24               | 21/23                   |
| Added sugars, g         | 0               | 0                   | 0                 | 0               | 0                   | 0                       |
| Fat, g (%)              | 19 (33)/21 (31) | 18 (31)/21 (29)     | 18 (31)/21 (29)   | 24 (42)/27 (38) | 20 (35)/23 (33)     | 23 (41)/25 (37)         |
| Saturated fat, g        | 3               | 3                   | 3                 | 4               | 3/4                 | 3/4                     |
| Monounsaturated fat, g  | 2               | 2                   | 1/2               | 3               | 2                   | 3                       |
| Polyunsaturated fat, g  | 3               | 3                   | 3                 | 7/8             | 4/5                 | 6/7                     |
| Salt, g                 | 1               | 1                   | 1                 | 1               | 1                   | 1                       |
| <b>Day 3, Breakfast</b> |                 |                     |                   |                 |                     |                         |
| Energy, kcal            | 508/608         | 510/610             | 510/610           | 510/610         | 528/628             | 518/625                 |
| Protein, g (%)          | 9 (7)/10 (7)    | 13 (10)/15 (10)     | 13 (10)/15 (10)   | 13 (10)/15 (10) | 8 (6)/10 (6)        | 8 (6)/10 (6)            |
| Carbohydrate, g (%)     | 68 (53)/78 (52) | 60 (48)/71 (47)     | 60 (48)/71 (47)   | 60 (48)/71 (47) | 71 (54)/82 (52)     | 69 (53)/82 (54)         |
| Dietary fibre, g        | 8.2/8.8         | 11/12               | 11/12             | 11/12           | 9.3/9.8             | 8.6/9.6                 |
| Sugars, g               | 29              | 21                  | 21                | 21              | 31                  | 31                      |
| Added sugars, g         | 0               | 0                   | 0                 | 0               | 0                   | 0                       |
| Fat, g (%)              | 21 (37)/27 (38) | 22 (38)/28 (39)     | 22 (38)/28 (39)   | 22 (38)/28 (39) | 22 (37)/28 (39)     | 22 (37)/27 (38)         |

Continued.

| <b>Day 3, Breakfast</b> | <b>Control</b>    | <b>Carbohydrate</b> | <b>Microbiota</b> | <b>Lipid</b>      | <b>Inflammation</b> | <b>Oxidative stress</b> |
|-------------------------|-------------------|---------------------|-------------------|-------------------|---------------------|-------------------------|
| Saturated fat, g        | 3/4               | 3/4                 | 3/4               | 3/4               | 5/6                 | 5/6                     |
| Monounsaturated fat, g  | 5/6               | 5/6                 | 5/6               | 5/6               | 4/6                 | 4/6                     |
| Polyunsaturated fat, g  | 8/11              | 8/11                | 8/11              | 8/11              | 7/10                | 7/10                    |
| Salt, g                 | 1                 | 1                   | 1                 | 1                 | 1                   | 0.5                     |
| <b>Day 1, Dinner</b>    |                   |                     |                   |                   |                     |                         |
| Energy, kcal            | 697/881           | 712/890             | 724/907           | 725/908           | 729/907             | 697/881                 |
| Protein, g (%)          | 19 (11)/25 (11)   | 19 (11)/25 (11)     | 20 (11)/26 (11)   | 21 (11)/26 (12)   | 20 (11)/25 (11)     | 19 (11)/25 (11)         |
| Carbohydrate, g         | 86 (50)/114 (52)  | 84 (48)/110 (50)    | 87 (48)/114 (50)  | 86 (48)/114 (50)  | 86 (48)/112 (50)    | 86 (50)/114 (52)        |
| Dietary fibre, g        | 12/14             | 23/26               | 22/25             | 14/16             | 15/18               | 12/14                   |
| Sugars, g               | 24/28             | 27/33               | 25/29             | 24/28             | 27/32               | 24/28                   |
| Added sugars, g         | 0                 | 0                   | 0                 | 0                 | 0                   | 0                       |
| Fat, g (%)              | 29 (36)/34 (34)   | 28 (35)/33 (33)     | 29 (35)/34 (33)   | 31 (37)/36 (35)   | 31 (37)/36 (35)     | 29 (36)/34 (34)         |
| Saturated fat, g        | 7/9               | 7/9                 | 7/9               | 7/9               | 8/10                | 7/9                     |
| Monounsaturated fat, g  | 7                 | 7                   | 7                 | 7/8               | 7/8                 | 7                       |
| Polyunsaturated fat, g  | 11/13             | 11/13               | 11/13             | 12/14             | 12/14               | 11/13                   |
| Salt, g                 | 2/3               | 2/3                 | 2/3               | 2/3               | 2/3                 | 2/3                     |
| <b>Day 2, Dinner</b>    |                   |                     |                   |                   |                     |                         |
| Energy, kcal            | 704/871           | 731/897             | 731/897           | 742/912           | 718/884             | 742/901                 |
| Protein, g (%)          | 21 (12)/26 (12)   | 21 (11)/26 (12)     | 21 (11)/26 (12)   | 22 (12)/28 (12)   | 21 (12)/27 (12)     | 21 (11)/26 (12)         |
| Carbohydrate, g         | 90 (54)/116 (51)  | 95 (52)/121 (54)    | 95 (52)/121 (54)  | 96 (52)/122 (53)  | 92 (51)/118 (54)    | 96 (52)/122 (54)        |
| Dietary fibre, g        | 14/17             | 25/28               | 25/28             | 15/18             | 15/18               | 16/18                   |
| Sugars, g               | 5/6               | 11/12               | 11/12             | 11                | 5/6                 | 12/13                   |
| Added sugars, g         | 0                 | 0                   | 0                 | 0                 | 0                   | 0                       |
| Fat, g (%)              | 27 (33)/31 (30)   | 25 (30)/29 (28)     | 25 (30)/29 (28)   | 28 (32)/29 (31)   | 27 (33)/31 (30)     | 28 (33)/32 (30)         |
| Saturated fat, g        | 3/4               | 3/4                 | 3/4               | 3/4               | 4                   | 4                       |
| Monounsaturated fat, g  | 12/15             | 12/14               | 12/14             | 13/15             | 12/15               | 13/15                   |
| Polyunsaturated fat, g  | 8/9               | 7/8                 | 7/8               | 9/10              | 8/9                 | 9/10                    |
| Salt, g                 | 3/4               | 3/4                 | 3/4               | 3/4               | 3/4                 | 3/4                     |
| <b>Day 3, Dinner</b>    |                   |                     |                   |                   |                     |                         |
| Energy, kcal            | 699/877           | 731/909             | 731/909           | 722/900           | 732/911             | 723/901                 |
| Protein, g (%)          | 23 (13)/28 (13)   | 25 (14)/31 (14)     | 25 (14)/31 (14)   | 25 (14)/31 (14)   | 24 (13)/30 (13)     | 24 (13)/30 (13)         |
| Carbohydrate, g (%)     | 105 (60)/131 (60) | 106 (58)/131 (58)   | 106 (58)/131 (58) | 106 (58)/131 (59) | 107 (59)/133 (58)   | 109 (60)/135 (61)       |

Continued.

Concluded.

| Day 3, Dinner          | Control         | Carbohydrate    | Microbiota      | Lipid           | Inflammation    | Oxidative stress |
|------------------------|-----------------|-----------------|-----------------|-----------------|-----------------|------------------|
| Dietary fibre, g       | 11/13           | 22/25           | 22/25           | 14/16           | 12/14           | 11/14            |
| Sugars, g              | 20/23           | 19/22           | 19/22           | 20/23           | 20/23           | 24/27            |
| Added sugars, g        | 0               | 0               | 0               | 0               | 0               | 0                |
| Fat, g (%)             | 19 (24)/24 (24) | 19 (22)/25 (23) | 19 (22)/25 (23) | 19 (23)/25 (24) | 21 (25)/26 (25) | 19 (23)/25 (24)  |
| Saturated fat, g       | 3/4             | 3/4             | 3/4             | 3/4             | 3/4             | 3/4              |
| Monounsaturated fat, g | 7/10            | 7/9             | 7/9             | 7/10            | 8/10            | 7/9              |
| Polyunsaturated fat, g | 6/8             | 6/8             | 6/8             | 7/9             | 7/9             | 6/8              |
| Salt, g                | 2/3             | 2/3             | 2/3             | 2/3             | 2/3             | 2/3              |

Values are presented as 'female/male' unless equal for both genders.
